# Supplementary material for: Contribution of the Type III Secretion System (T3SS2) of Vibrio parahaemolyticus in Mitochondrial Stress in Human Intestinal Cells
Source: MDPI journal article supplement (doi:10.3390/microorganisms12040813), 2024-04-17
Supplement: s1 [file s1]

Supplementary Figure S1.

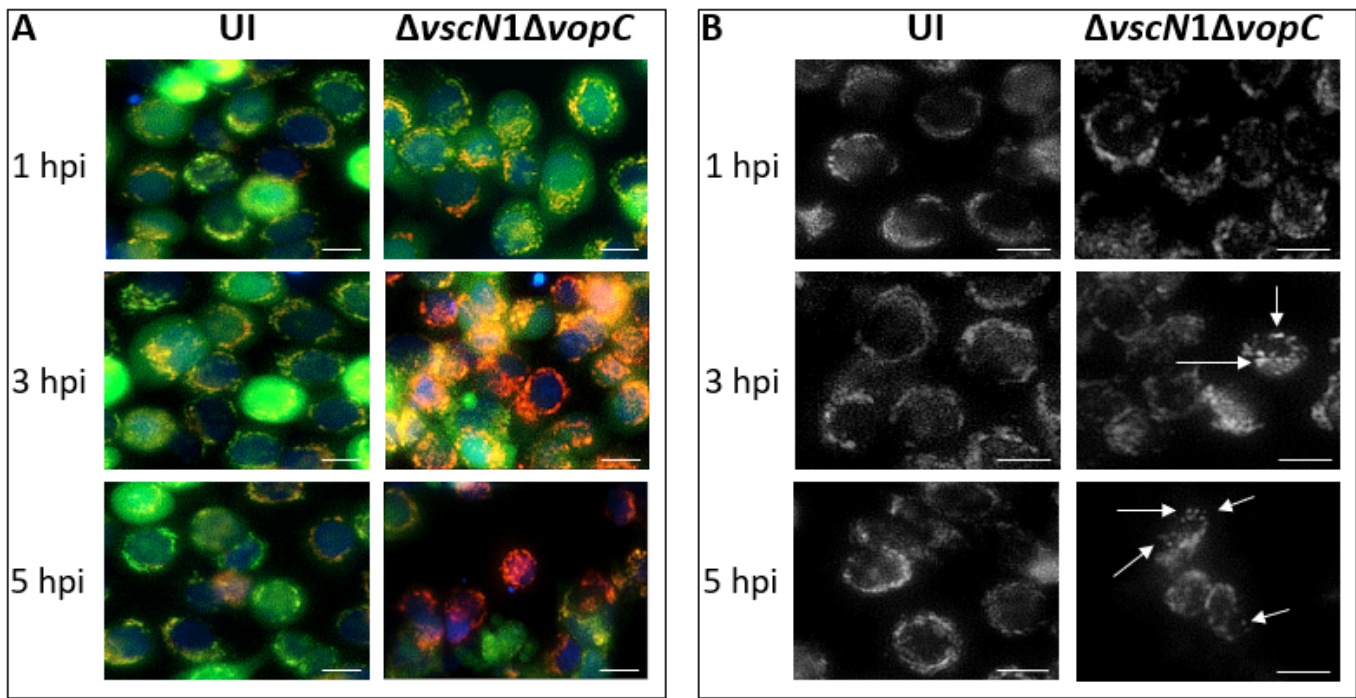

**Supplementary Figure S1.** *V. parahaemolyticus* *vopC* mutant strain induce mPTP opening and mitochondrial fragmentation in intestinal cells T3SS2-dependent. **(A)** Uninfected HT-29 cells (UI) and infected with *V. parahaemolyticus*  $\Delta vscn1 \Delta vopC$  strain ( $\Delta vopC$ , T3SS2+) at 1, 3 and 5 hpi. In the figures, green color indicates the mPTP are closed (healthy mitochondria), red color shows the mitochondrial mass (stress condition), and blue color represents the Hoechst-stained nuclei. **(B)** Mitochondria network morphology at 1, 3 and 5 hpi was analyzed by microscopy. White arrows show cells with mitochondrial fragmentation. Representative images from 3 independent trials are shown. Scale bar: 10  $\mu m$ .
